# Supplementary material for: A chiral molecular propeller designed for unidirectional rotations on a surface
Source: PubMed Central journal article supplement (PMC6702202; doi:10.1038/s41467-019-11737-1), 2019-08-20
Supplement: 41467_2019_11737_MOESM3_ESM.pdf [file 41467_2019_11737_MOESM3_ESM.pdf]

## **Description of Additional Supplementary Files**

File Name: Supplementary Movie 1

Description: Pi-ring tilt angle during rotation

File Name: Supplementary Movie 2

Description: Propeller rotation movie
